# Supplementary material for: Prophage-Encoded Staphylococcal Enterotoxin A: Regulation of Production in Staphylococcus aureus Strains Representing Different Sea Regions
Source: PubMed Central journal article supplement (PMC4690139; doi:10.3390/toxins7124889), 2015-12-09
Supplement: toxins-07-04889-s001.pdf [file toxins-07-04889-s001.pdf]

# Supplementary Materials: Prophage-Encoded Staphylococcal Enterotoxin A: Regulation of Production in *Staphylococcus aureus* Strains Representing Different *Sea* Regions

Nikoleta Zeaki, Yusak Budi Susilo, Anna Pregiel, Peter Rådström and Jenny Schelin \*

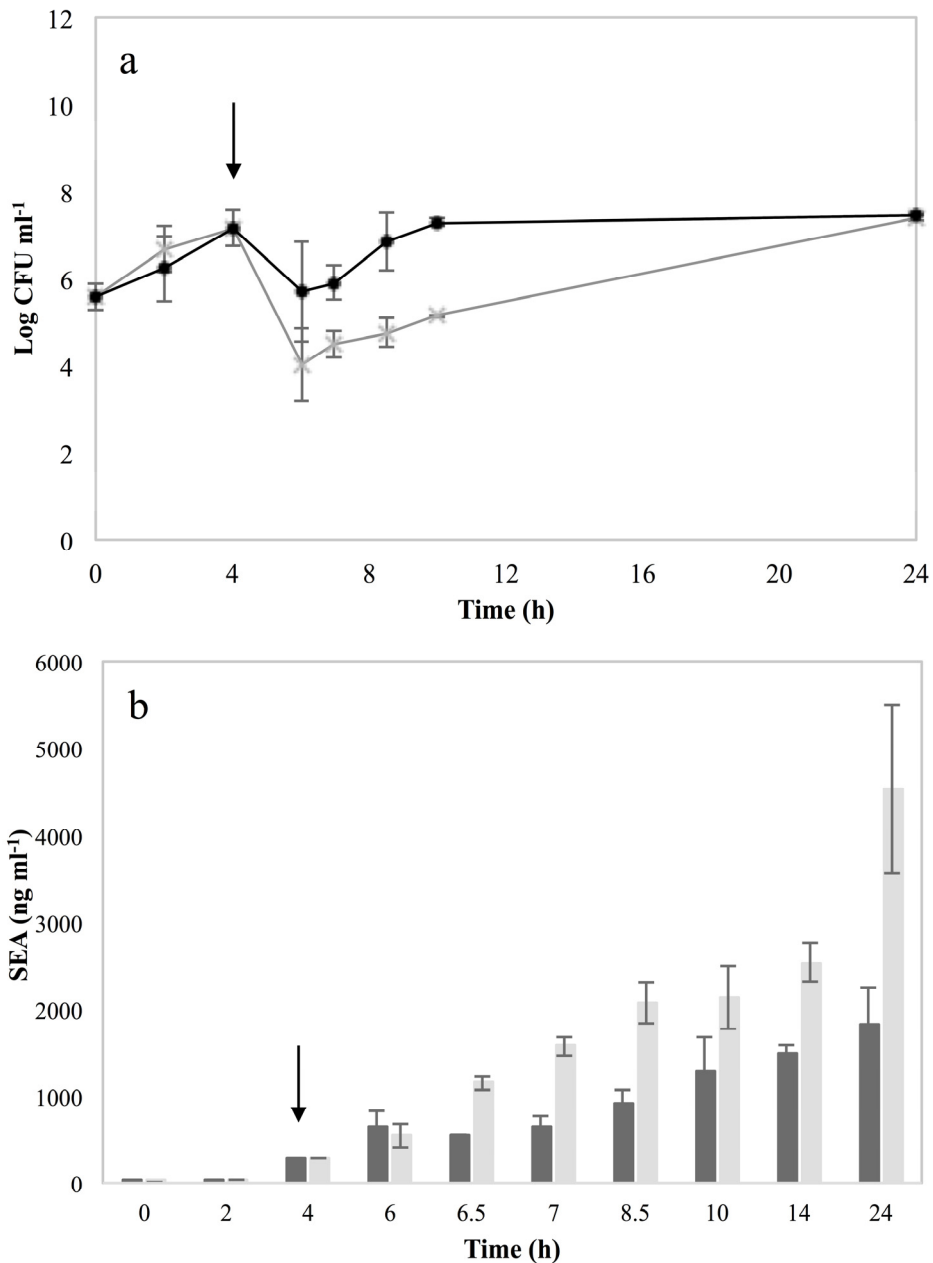

**Figure S1.** *Staphylococcus aureus* (*S. aureus*) strain Sa17 grown in Brain Heart Infusion (BHI) under control and Mitomycin C (MMC) induced conditions. Average values including standard deviations ( $\bar{x}$ ,  $\pm$ ) of three independent experiments are presented. In MMC induced culture, the point of induction at 4 h is indicated with an arrow. Time is represented in the X-axis in hours (h). **Dark grey** bars represent the control culture and **light grey** bars the MMC induced culture. (a) Growth in log CFU (Y-axis) under control (●) and induced (×) conditions. (b) SEA levels (bars) in ng·mL<sup>-1</sup> of culture (Y-axis).

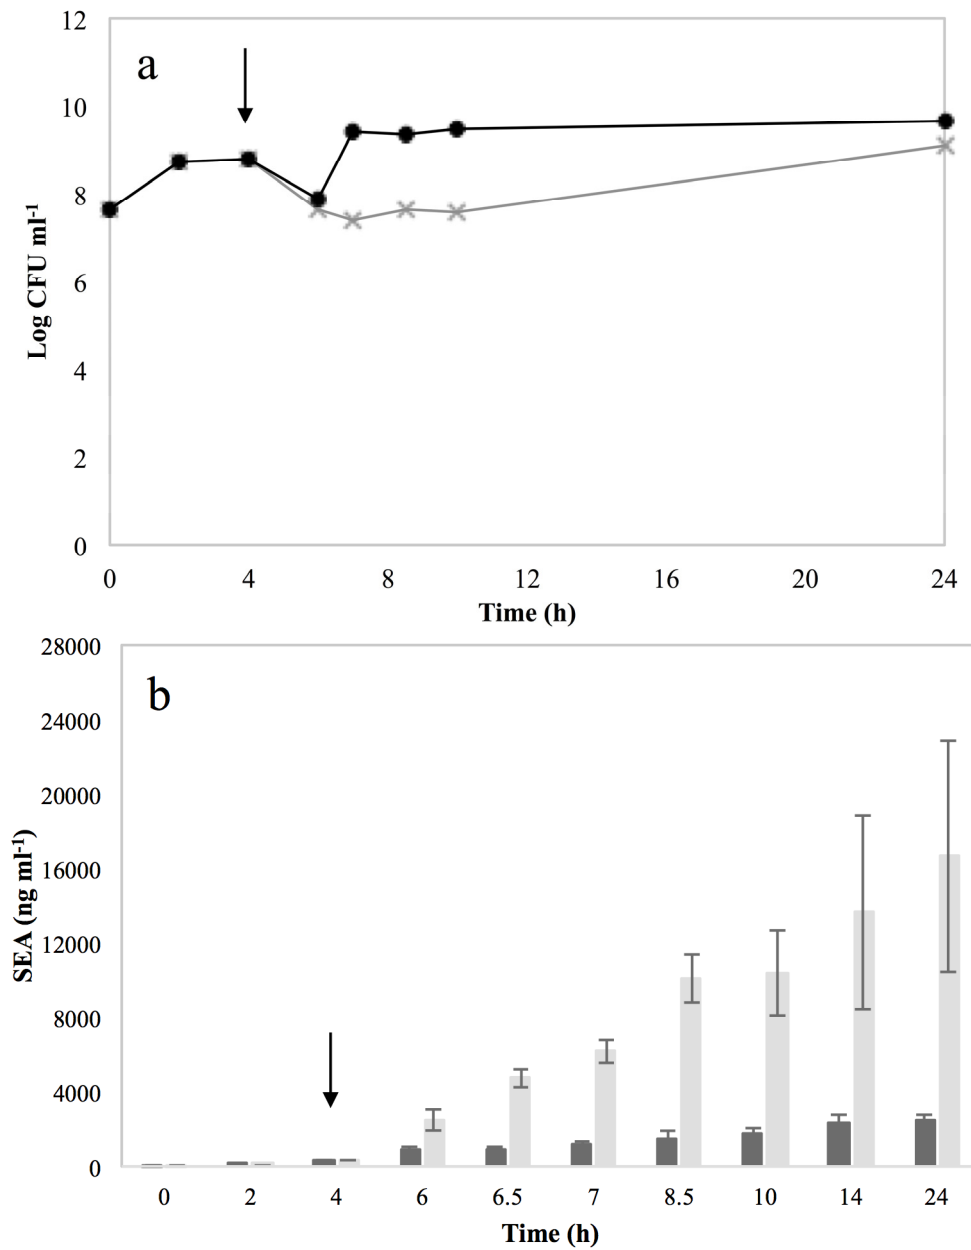

**Figure S2.** *S. aureus* strain Sa48 grown in BHI under control and MMC induced conditions. Average values including standard deviations ( $\bar{x}$ ,  $\pm$ ) of three independent experiments are presented. In MMC induced culture, the point of induction at 4 h is indicated with an arrow. Time is represented in the X-axis in hours (h). **Dark grey** bars represent the control culture and **light grey** bars the MMC induced culture. (a) Growth in log CFU (Y-axis) under control (●) and induced (×) conditions. (b) SEA levels (bars) in ng·mL<sup>-1</sup> of culture (Y-axis).

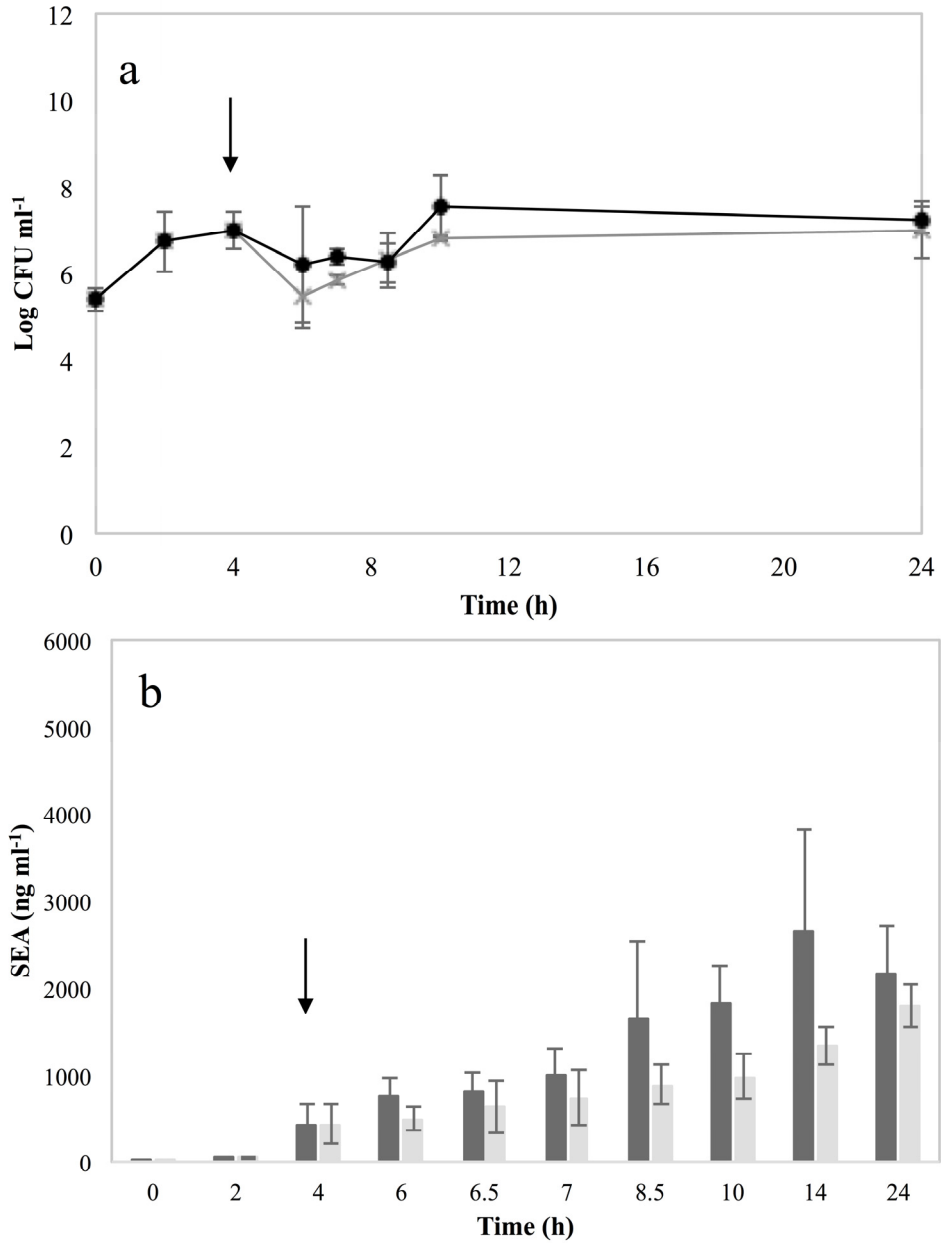

**Figure S3.** *S. aureus* strain Sa21 grown in BHI under control and MMC induced conditions. Average values including standard deviations ( $\bar{x}$ ,  $\pm$ ) of three independent experiments are presented. In MMC induced culture, the point of induction at 4 h is indicated with an arrow. Time is represented in the X-axis in hours (h). **Dark grey** bars represent the control culture and **light grey** bars the MMC induced culture. (a) Growth in log CFU (Y-axis) under control (●) and induced (×) conditions. (b) SEA levels (bars) in ng·mL<sup>-1</sup> of culture (Y-axis).

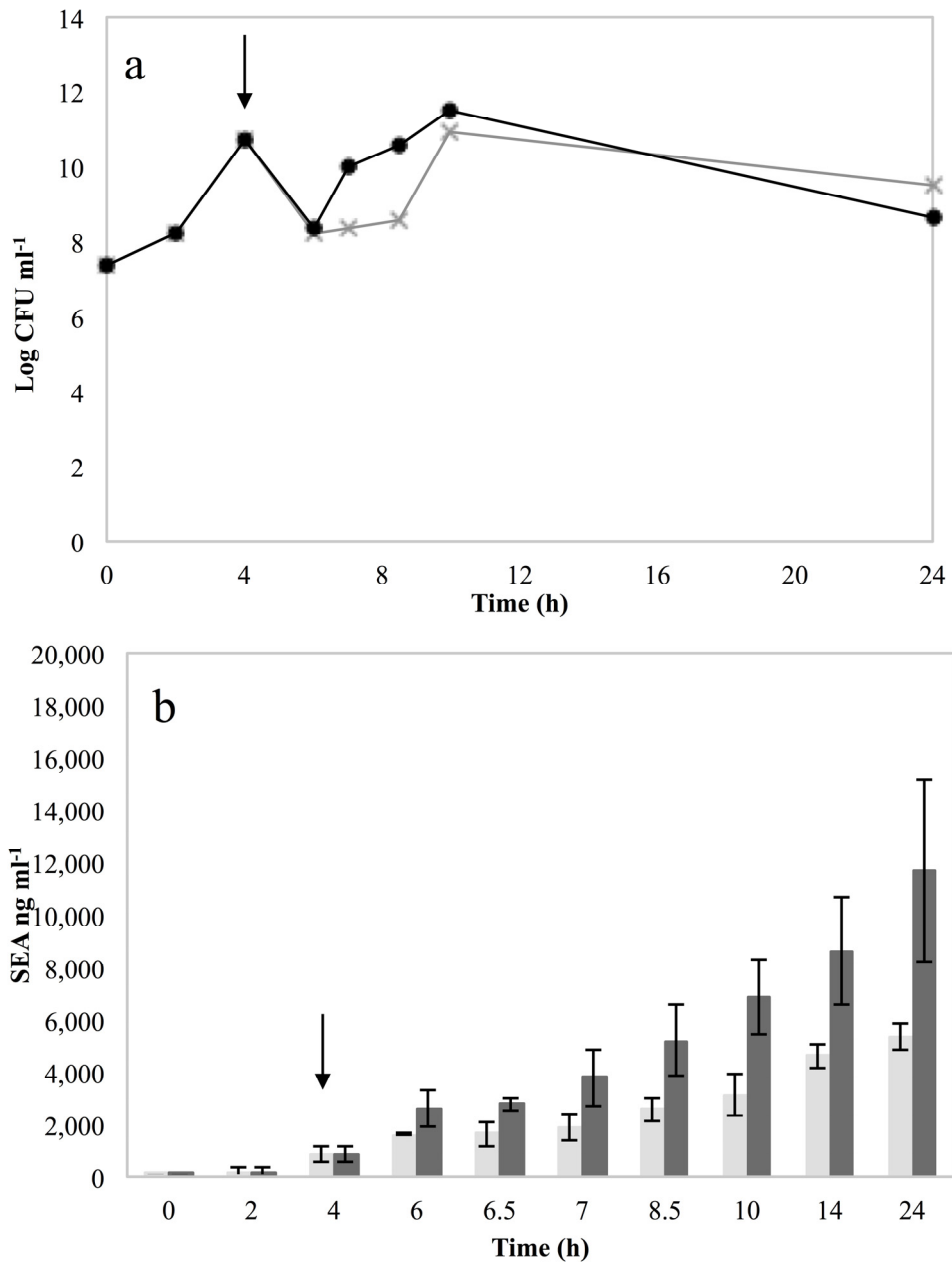

**Figure S4.** *S. aureus* strain Mu50 grown in BHI under control and MMC induced conditions. Average values including standard deviations ( $\bar{x}$ ,  $\pm$ ) of three technical replicates are presented. In MMC induced culture, the point of induction at 4 h is indicated with an arrow. Time is represented in the X-axis in hours (h). **Dark grey** bars represent the control culture and **light grey** bars the MMC induced culture. (a) Growth in log CFU (Y-axis) under control (●) and induced (×) conditions. (b) SEA levels (bars) in ng·mL<sup>-1</sup> of culture (Y-axis).



**b**

|         |     |                       |                      |                      |                       |
|---------|-----|-----------------------|----------------------|----------------------|-----------------------|
| Sa51    | 1   | TTTATTTGGTGCCTCAAGGAC | AATATCCAGATACACAGTTG | AGGATATATAGAGATAATAA | AACGATTAAGTCTAAAAATA  |
| MRSA252 | 1   | TTTATTTGGTGCCTCAAGGAC | AGAATTCAAATACACTATTA | AGAATATATAGAGATAATAA | AACGATTAAGTCTGAAAACA  |
| Newman  | 1   | TTTATTTGGTGCCTCAAGGAC | AGAATTCAAATACACTATTA | AGAATATATAGAGATAATAA | AACGATTAAGTCTGAAAACA  |
| Sa53    | 1   | TTTATTTGGTGCCTCAAGGAC | AGTATTCAAATACACTATTA | AGAATATATAGAGATAATAA | AACGATTAAGTCTGAAAACA  |
| Sa48    | 1   | TTTATTTGGTGCCTCAAGGAC | AGTATTCAAATACACTATTA | AGAATATATAGAGATAATAA | AACGATTAAGTCTGAAAACA  |
| Sa45    | 1   | TTTATTTGGTGCCTCAAGGAC | AGTATTCAAATACACTATTA | AGAATATATAGAGATAATAA | AACGATTAAGTCTGAAAACA  |
| Sa17    | 1   | TTTATTTGGTGCCTCAAGGAC | AGTATTCAAATACACTATTA | AGAATATATAGAGATAATAA | AACGATTAAGTCTGAAAACA  |
| Sa54    | 1   | TTTATTTGGTGCCTCAAGGAC | AGTATTCAAATACACTATTA | AGAATATATAGAGATAATAA | AACGATTAAGTCTGAAAACA  |
| Sa21    | 1   | TTTATTTGGTGCCTCAAGGAC | AGTATTCAAATACACTATTA | AGAATATATAGAGATAATAA | AACGATTAAGTCTGAAAACA  |
| MW2     | 1   | TTTATTTGGTGCCTCAAGGAC | AGTATTCAAATACACTATTA | AGAATATATAGAGATAATAA | AACGATTAAGTCTGAAAACA  |
| Mu50    | 1   | TTTATTTGGTGCCTCAAGGAC | AGTATTCAAATACACTATTA | AGAATATATAGAGATAATAA | AACGATTAAGTCTGAAAACA  |
|         |     | *****                 | * * * * *            | ** * * * * *         | ***** * * * * *       |
|         |     |                       | <b>STOP</b>          |                      |                       |
| Sa51    | 81  | TGCATATTGATATATATTTA  | TATACAAGTTGAGTGA     | TTGGCTGAAAAAATTTAAA  | TCTATAAAAAAGTACCATAAG |
| MRSA252 | 81  | TGCATATTGATATATATTTA  | TATACAAGTT-----      | -----                | -----                 |
| Newman  | 81  | TGCATATTGATATATATTTA  | TATACAAGTT-----      | -----                | -----                 |
| Sa53    | 81  | TGCATATTGATATATATTTA  | TATACAAGTT-----      | -----                | -----                 |
| Sa48    | 81  | TGCATATTGATATATATTTA  | TATACAAGTT-----      | -----                | -----                 |
| Sa45    | 81  | TGCATATTGATATATATTTA  | TATACAAGTT-----      | -----                | -----                 |
| Sa17    | 81  | TGCATATTGATATATATTTA  | TATACAAGTT-----      | -----                | -----                 |
| Sa54    | 81  | TGCATATTGATATATATTTA  | TATACAAGTT-----      | -----                | -----                 |
| Sa21    | 81  | TGCATATTGATATATATTTA  | TATACAAGTT-----      | -----                | -----                 |
| MW2     | 81  | TGCATATTGATATATATTTA  | TATACAAGTT-----      | -----                | -----                 |
| Mu50    | 81  | TGCATATTGATATATATTTA  | TATACAAGTT-----      | -----                | -----                 |
|         |     | *****                 | *****                | *****                | *****                 |
| Sa51    | 161 | TTATTTTATTACTATACTTA  | AAACATTCACTTTTTACTG  | CTGTTTGTAAAGTTTATAAA | AAATTTCTATAGATAGTTTT  |
| MRSA252 | 161 | -----                 | AAACATGGTAGTTTTGAACA | C-----GTAATGTT-----  | -----CAGATTATTAT      |
| Newman  | 161 | -----                 | AAACATGGTAGTTTTGAACA | C-----GTAATGTT-----  | -----CAGATTATTAT      |
| Sa53    | 161 | -----                 | AAACATGGTAGTTTTGACCA | C-----GTAATGTT-----  | -----CAGATTATTAT      |
| Sa48    | 161 | -----                 | AAACATGGTAGTTTTGACCA | C-----GTAATGTT-----  | -----CAGATTATTAT      |
| Sa45    | 161 | -----                 | AAACATGGTAGTTTTGACCA | C-----GTAATGTT-----  | -----CAGATTATTAT      |
| Sa17    | 161 | -----                 | AAACATGGTAGTTTTGACCA | C-----GTAATGTT-----  | -----CAGATTATTAT      |
| Sa54    | 161 | -----                 | AAACATGGTAGTTTTGACCA | C-----GTAATGTT-----  | -----CAGATTATTAT      |
| Sa21    | 161 | -----                 | AAACATGGTAGTTTTGACCA | C-----GTAATGTT-----  | -----CAGATTATTAT      |
| MW2     | 161 | -----                 | AAACATGGTAGTTTTGACCA | C-----GTAATGTT-----  | -----CAGATTATTAT      |
| Mu50    | 161 | -----                 | AAACATGGTAGTTTTGACCA | C-----GTAATGTT-----  | -----CAGATTATTAT      |
|         |     | *****                 | **** *               | * **** *             | **** ** *             |
| Sa51    | 241 | GAACAAAGCGAGAATAATCT  | GAAAGTATACAAGCAGTAAA | AAAAGTATATGTGCTATAAT |                       |
| MRSA252 | 241 | GAAC---CGAGAATAATCT   | GAAAGTTTACAAGCAGTAAA | AAAAGTATATGTGCTATAAT |                       |
| Newman  | 241 | GAAC---CGAGAATAATCT   | GAAAGTTTACAAGCAGTAAA | AAAAGTATATGTGCTATAAT |                       |
| Sa53    | 241 | GAAC---CGAGAATAATCT   | AAAAGTTTACAAGCAGTAAA | AAAAGTATATGTGCTATAAT |                       |
| Sa48    | 241 | GAAC---CGAGAATAATCT   | AAAAGTTTACAAGCAGTAAA | AAAAGTATATGTGCTATAAT |                       |
| Sa45    | 241 | GAAC---CGAGAATAATCT   | AAAAGTTTACAAGCAGTAAA | AAAAGTATATGTGCTATAAT |                       |
| Sa17    | 241 | GAAC---CGAGAATAATCT   | AAAAGTTTACAAGCAGTAAA | AAAAGTATATGTGCTATAAT |                       |
| Sa54    | 241 | GAAC---CGAGAATAATCT   | AAAAGTTTACAAGCAGTAAA | AAAAGTATATGTGCTATAAT |                       |
| Sa21    | 241 | GAAC---CGAGAATAATCT   | AAAAGTTTACAAGCAGTAAA | AAAAGTATATGTGCTATAAT |                       |
| MW2     | 241 | GAAC---CGAGAATAATCT   | AAAAGTTTACAAGCAGTAAA | AAAAGTATATGTGCTATAAT |                       |
| Mu50    | 241 | GAAC---CGAGAATAATCT   | AAAAGTTTACAAGCAGTAAA | AAAAGTATATGTGCTATAAT |                       |
|         |     | ****                  | *****                | *****                | *****                 |

**c**

|           |     |     |                                                                                                                                                                                                                                                                                                                                                                                                                                                                                                  |
|-----------|-----|-----|--------------------------------------------------------------------------------------------------------------------------------------------------------------------------------------------------------------------------------------------------------------------------------------------------------------------------------------------------------------------------------------------------------------------------------------------------------------------------------------------------|
| MW2, Sa17 | SEA | 1   | MKKTAF <sup>#</sup> TL <sup>#</sup> LL <sup>#</sup> LFIAL <sup>#</sup> TL <sup>#</sup> LT <sup>#</sup> SP <sup>#</sup> LV <sup>#</sup> NG <sup>#</sup> SEK <sup>#</sup> SEE <sup>#</sup> INE <sup>#</sup> KDL <sup>#</sup> RK <sup>#</sup> SE <sup>#</sup> LQ <sup>#</sup> GTAL <sup>#</sup> GN <sup>#</sup> LK <sup>#</sup> Q <sup>#</sup> IYY <sup>#</sup> NEKA                                                                                                                                |
| Sa51      | SEA | 1   | LKKT <sup>#</sup> TF <sup>#</sup> ILL <sup>#</sup> SFIAL <sup>#</sup> TL <sup>#</sup> TS <sup>#</sup> PE <sup>#</sup> VNC <sup>#</sup> SEK <sup>#</sup> SEE <sup>#</sup> ING <sup>#</sup> KDL <sup>#</sup> QK <sup>#</sup> SE <sup>#</sup> LQ <sup>#</sup> TALS <sup>#</sup> NL <sup>#</sup> R <sup>#</sup> Q <sup>#</sup> TY <sup>#</sup> YH <sup>#</sup> NGSA                                                                                                                                  |
| MW2, Sa17 | SEA | 61  | KTENKESH <sup>#</sup> DQ <sup>#</sup> FL <sup>#</sup> Q <sup>#</sup> HT <sup>#</sup> IL <sup>#</sup> FK <sup>#</sup> GF <sup>#</sup> FT <sup>#</sup> DHS <sup>#</sup> WYND <sup>#</sup> LL <sup>#</sup> VD <sup>#</sup> F <sup>#</sup> DS <sup>#</sup> KD <sup>#</sup> IV <sup>#</sup> DK <sup>#</sup> YK <sup>#</sup> GK <sup>#</sup> KV <sup>#</sup> DL <sup>#</sup> YG <sup>#</sup> YY <sup>#</sup> GY <sup>#</sup> QC                                                                        |
| Sa51      | SEA | 61  | LLENKESND <sup>#</sup> Q <sup>#</sup> FL <sup>#</sup> K <sup>#</sup> NT <sup>#</sup> IL <sup>#</sup> FN <sup>#</sup> DF <sup>#</sup> FT <sup>#</sup> GH <sup>#</sup> QWYND <sup>#</sup> LL <sup>#</sup> V <sup>#</sup> DL <sup>#</sup> GS <sup>#</sup> KD <sup>#</sup> TANI <sup>#</sup> YK <sup>#</sup> GK <sup>#</sup> KV <sup>#</sup> DL <sup>#</sup> YG <sup>#</sup> YY <sup>#</sup> GY <sup>#</sup> QC                                                                                      |
| MW2, Sa17 | SEA | 121 | AGGTPNK <sup>#</sup> TAC <sup>#</sup> MYGG <sup>#</sup> VT <sup>#</sup> LHD <sup>#</sup> NN <sup>#</sup> RL <sup>#</sup> TE <sup>#</sup> EKK <sup>#</sup> VP <sup>#</sup> IN <sup>#</sup> LW <sup>#</sup> LD <sup>#</sup> GK <sup>#</sup> Q <sup>#</sup> NT <sup>#</sup> V <sup>#</sup> PL <sup>#</sup> ET <sup>#</sup> VK <sup>#</sup> TN <sup>#</sup> K <sup>#</sup> N <sup>#</sup> V <sup>#</sup> T <sup>#</sup> V <sup>#</sup> Q <sup>#</sup> E <sup>#</sup> LD                              |
| Sa51      | SEA | 121 | TGGT <sup>#</sup> PE <sup>#</sup> RK <sup>#</sup> TAC <sup>#</sup> MYGG <sup>#</sup> VT <sup>#</sup> LHD <sup>#</sup> NN <sup>#</sup> Q <sup>#</sup> LE <sup>#</sup> E <sup>#</sup> EKK <sup>#</sup> VP <sup>#</sup> IN <sup>#</sup> LW <sup>#</sup> LD <sup>#</sup> GK <sup>#</sup> Q <sup>#</sup> NT <sup>#</sup> V <sup>#</sup> PL <sup>#</sup> GT <sup>#</sup> VK <sup>#</sup> TN <sup>#</sup> K <sup>#</sup> EV <sup>#</sup> T <sup>#</sup> V <sup>#</sup> Q <sup>#</sup> E <sup>#</sup> LD |
| MW2, Sa17 | SEA | 181 | LQARRYLQ <sup>#</sup> EKY <sup>#</sup> NLY <sup>#</sup> NS <sup>#</sup> DV <sup>#</sup> FDG <sup>#</sup> KV <sup>#</sup> QR <sup>#</sup> GLI <sup>#</sup> VF <sup>#</sup> H <sup>#</sup> TS <sup>#</sup> TE <sup>#</sup> PS <sup>#</sup> VNY <sup>#</sup> DL <sup>#</sup> FGA <sup>#</sup> Q <sup>#</sup> Q <sup>#</sup> YS <sup>#</sup> NT <sup>#</sup> LL <sup>#</sup> RI <sup>#</sup> Y <sup>#</sup> R <sup>#</sup> DN                                                                        |
| Sa51      | SEA | 181 | LQSKHYLHET <sup>#</sup> Y <sup>#</sup> NLY <sup>#</sup> NT <sup>#</sup> DA <sup>#</sup> FNG <sup>#</sup> KI <sup>#</sup> Q <sup>#</sup> RGL <sup>#</sup> IE <sup>#</sup> FH <sup>#</sup> ESS <sup>#</sup> SG <sup>#</sup> DS <sup>#</sup> VGY <sup>#</sup> DL <sup>#</sup> FGA <sup>#</sup> Q <sup>#</sup> Q <sup>#</sup> Y <sup>#</sup> PD <sup>#</sup> TQ <sup>#</sup> LRI <sup>#</sup> Y <sup>#</sup> R <sup>#</sup> DN                                                                       |
| MW2, Sa17 | SEA | 241 | KTINSEN <sup>#</sup> MHIDI <sup>#</sup> LYL <sup>#</sup> TS                                                                                                                                                                                                                                                                                                                                                                                                                                      |
| Sa51      | SEA | 241 | KTIKSKNMHIDI <sup>#</sup> LYL <sup>#</sup> TT                                                                                                                                                                                                                                                                                                                                                                                                                                                    |

**Figure S6. (a,b)** Sequence alignment of the start and stop region, respectively, of the *sea* gene region of 11 *S. aureus* strains. Start and stop codons are indicated with boxes. Differences in the sequences are indicated by the absence of star sign under the sequences. **(c)** Alignments of *S. aureus* MW2, Sa17 and Sa51 SEA amino acid sequences. Differences (59 amino acids) are highlighted in grey. The colon symbol (: ) denotes a conservative mutation and the hash symbol (#) is denoting a non-conservation mutation.

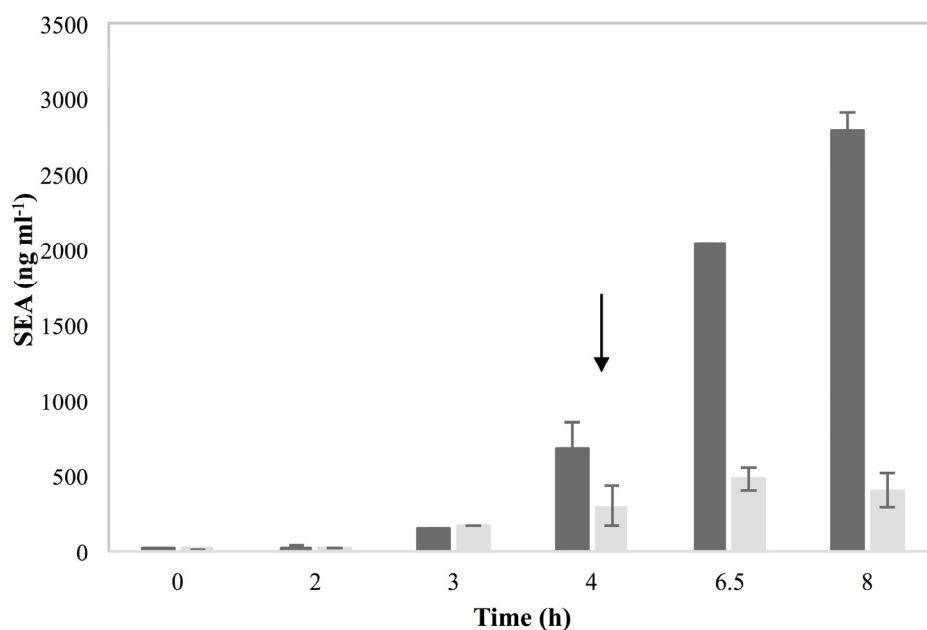

**Figure S7.** *S. aureus* strain Sa17 *recA*-disruption mutant grown in BHI under control and MMC induced conditions. Average values including standard deviations ( $\bar{x}$ ,  $\pm$ ) of three technical replicates are presented. In MMC induced culture, the point of induction at 4 h is indicated with an arrow. Time is represented in the X-axis in hours (h). The Y axis represents SEA levels in ng·mL<sup>-1</sup> of culture in **Dark grey** bars for the control culture and **light grey** bars for the MMC induced culture.

**Table S1.** *S. aureus* strains used for the sequencing and alignment of the attachment sites of the respective prophages.

| Strain Name | NCBI Accession Number |
|-------------|-----------------------|
| Mu50        | KT253887              |
| Sa17        | KT253888              |
| Sa48        | KT253889              |
| Sa51        | KT253890              |
| Sa54        | KT253891              |

**Table S2.** Measurement of density of amplicons of RF from *S. aureus* strains Sa17 wild type and Sa17  $\Delta recA$  grown in BHI under induced and control conditions.

| Sample       | Mean Value Intensity (INT) |
|--------------|----------------------------|
| 2 h_a        | 220.22                     |
| 2 h_b        | 215.40                     |
| 3 h_a        | 323.28                     |
| 3 h_b        | 354.14                     |
| 4 h_a        | 540.90                     |
| 4 h_b        | 454.30                     |
| 6.5 h_a      | 526.96                     |
| 6.5 h_b      | 865.06                     |
| 8 h_a        | 386.51                     |
| 8 h_b        | 931.23                     |
| pos. control | 1284.69                    |
| neg. control | 214.12                     |
